# Supplementary material for: Control of Gut Inflammation by Modulation of Purinergic Signaling
Source: PubMed Central journal article supplement (PMC7544737; doi:10.3389/fimmu.2020.01882), 2020-09-25
Supplement: Table_1.pdf [file Table_1.pdf]

## Supplementary Table 1. Effects of purinergic receptors in the pathophysiology of inflammatory bowel disease

| Purinergic receptor            | Cell population                                           | Experimental model/clinical settings                                        | Effect                                                                                                                                                                      | Reference |
|--------------------------------|-----------------------------------------------------------|-----------------------------------------------------------------------------|-----------------------------------------------------------------------------------------------------------------------------------------------------------------------------|-----------|
| <b>P2X7R</b>                   | Global deletion/inhibition                                | TNBS-induced colitis (rat or mouse)                                         | Administration of selective inhibitor A740003 or brilliant blue G prevents development of experimental colitis in rat; P2X7R global deletion is protective in murine models | [13,14]   |
|                                | Enteric Neurons                                           | Rat model of ulcerative colitis                                             | Expression correlates with decreased neuronal density and is associated with enteric neuron death                                                                           | [15]      |
|                                |                                                           | TNBS-induced colitis (rat)                                                  | Promotes intestinal inflammation                                                                                                                                            | [15]      |
|                                | Mast cells                                                | TNBS-induced colitis (mouse)<br>Crohn's disease patients                    | Release of pro-inflammatory cytokines                                                                                                                                       | [23]      |
|                                | CD4 <sup>+</sup> CD45RB <sup>low</sup> regulatory T cells | TNBS-induced colitis (mouse)                                                | Higher sensitivity to ATP-induced cell death                                                                                                                                | [14]      |
|                                | Macrophages, DC                                           | CD patients' intestinal mucosa                                              | Release of IFN- $\gamma$ , TNF- $\alpha$ and IL-1 $\beta$                                                                                                                   | [24]      |
|                                | Intestinal epithelial cells (IEC)                         | Colonic tissue from CD and UC patients                                      | Expression of chemoattractive proteins (e.g. ICAM-1) and induction of IL-1 $\beta$ secretion                                                                                | [17]      |
| <b>P2Y2R</b>                   | Administration of 2-thioUTP                               | DSS-induced colitis (mouse)                                                 | Reduction of disease activity index, protective role                                                                                                                        | [34]      |
|                                | Human colonic cell lines or human IEC                     | Colonic tissue from CD and UC patients                                      | P2Y2R activation increases expression of chemoattractive proteins                                                                                                           | [33]      |
| <b>P2Y6R</b>                   | IEC                                                       | DSS-induced colitis (mouse)                                                 | Induction of CXCL8 expression with consequent neutrophil recruitment and inflammation                                                                                       | [35]      |
|                                | Th17/Th1 cells                                            | DSS-induced colitis (mouse)                                                 | Global deletion is associated with increased Th17/Th1 cell recruitment in the gut mucosa and increased levels of pro-inflammatory cytokines                                 | [36]      |
|                                | Activated CD4 <sup>+</sup> and CD8 <sup>+</sup> T-cells   | Peripheral blood samples from IBD patients                                  | P2Y6R expression is associated with activated pro-inflammatory phenotype                                                                                                    | [37]      |
| <b>A1R, A2AR, A2BR and A3R</b> | Murine colonic tissue                                     | TNBS-induced colitis (mouse)                                                | Electroacupuncture increases A1R, A2AR, A3R expression and decreases A2BR levels in colonic tissue; inhibition of IL-1 $\beta$ and substance P (SP) release                 | [47]      |
| <b>A2AR</b>                    | Colonic muscle                                            | Rat colonic longitudinal muscle preparations and DNBS-induced colitis (rat) | Receptor stimulation reduces colon motility                                                                                                                                 | [49]      |
|                                | Global inhibition                                         | DNBS and DSS-induced colitis in Sprague-Dawley rats                         | Administration of A2AR agonist polydeoxyribonucleotide (PDRN), ameliorates clinical symptoms and reduces pro-inflammatory cytokine levels                                   | [51]      |
|                                |                                                           | Colonic mucosa of active CD patients                                        | Overexpression of miRNA-16 is associated with A2AR downregulation                                                                                                           | [54]      |
|                                |                                                           | Oxazolone-induced colitis (rat)                                             | Administration of A2AR agonist PSB-0777 ameliorates clinical conditions and decreases TNF- $\alpha$ levels in colonic tissue                                                | [53]      |
| <b>A2BR</b>                    |                                                           | Rat ileum/jejunum preparations                                              | A2BR selective antagonists improve the impaired acetylcholine-induced contractions                                                                                          | [52]      |
|                                | Neutrophils                                               | DSS- or TNBS-induced colitis (mouse)                                        | A2BR deletion is associated with lower neutrophil recruitment                                                                                                               | [55]      |
|                                |                                                           | DSS- or Piroxicam-induced colitis (mouse)                                   | Administration of A2BR selective antagonist ATL-801 significantly lowers pro-inflammatory cytokine levels                                                                   | [56]      |
|                                | IEC                                                       | DSS-induced colitis (mouse)                                                 | Epithelial-specific A2BR deletion results in a milder form of experimental colitis                                                                                          | [58]      |
| <b>A3R</b>                     | CD4 <sup>+</sup> cells                                    | DSS-colitis model                                                           | Global A3R deletion protects from tissue damage, limiting CD4 <sup>+</sup> cells infiltration and preserving colon motility                                                 | [59]      |
|                                | PBMCs                                                     | PBMCs from CD patients                                                      | Higher levels of A3R are detected in patients' PBMCs when compared to healthy controls                                                                                      | [60]      |

Human colonic epithelial cells

A3R activation inhibits NF- $\kappa$ B signaling pathway leading to inhibition of IL-8 and IL-1 $\beta$  pro-inflammatory cytokines [61]

*Ex vivo* inflamed gut tissue

TNBS-induced colitis (rat)

A3R agonist N(6)-(3-iodobenzyl)-adenosine-5-N-methyluronamide limits colitis-induced upregulation of other pro-inflammatory purinergic receptors like P2X1, P2X4, P2X7, P2Y2, P2Y6, as well as A2AR and A2BR [62]

P2X7R: P2X7 receptor

TNBS: trinitro-benzene-sulfonic-acid

CD: Crohn's disease

UC: ulcerative colitis

P2Y2R: P2Y2 receptor

P2Y6R: P2Y6 receptor

IEC: intestinal epithelial cells

DSS: dextran sulfate sodium

A1R: A1 receptor

A2AR: A2A receptor

A3R: A3 receptor

A2BR: A2B receptor

DNBS: dinitro-benzene-sulfonic-acid
